# Supplementary figures and images for: Effect of Storage Time and Packing Method on the Freshness of Dried Lycium Fruit Using Electronic Nose and Chemometrics
Source: Hindawi journal article supplement (doi:10.1155/2020/6145189), 2020-03-04

**Graphical Abstract**


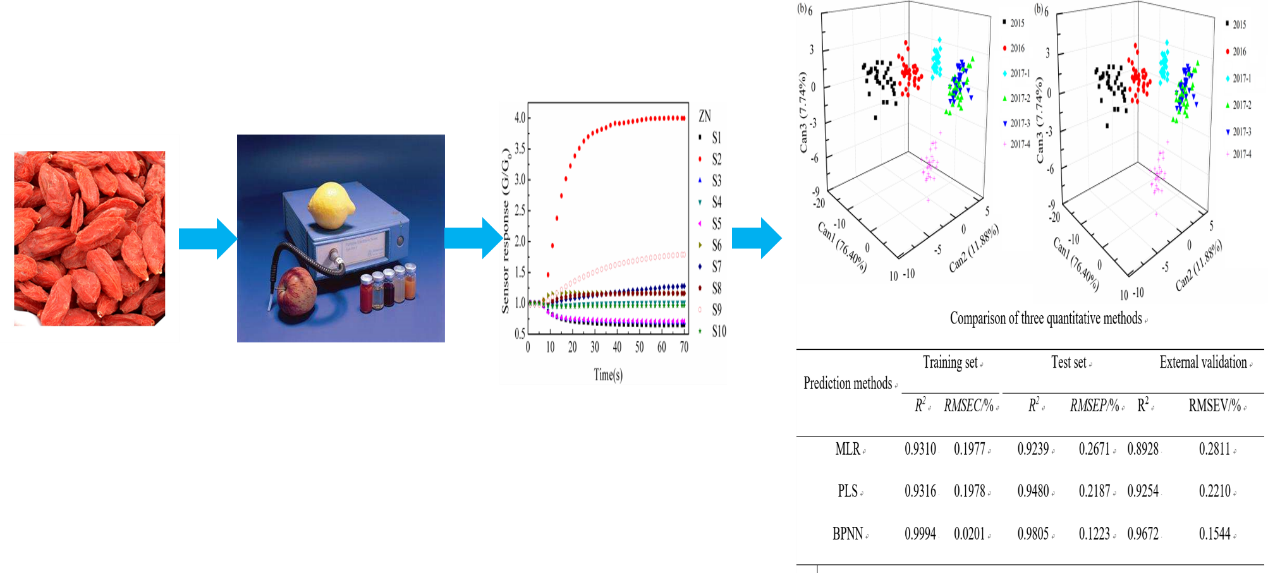

Supplement: f1 [file 6145189.f1.docx]
